# Supplementary material
Source: publisher figshare collection journal article supplement (https://acs.figshare.com/ndownloader/files/21519684)
Supplement: Supplementary file 1 [file 21519684]

# Morphology-controlled Self-assembly and Synthesis of Biopolyimide Particles from 4- Amino-L-phenylalanine

*Thawinda Hirayama,<sup>†,‡</sup> Amit Kumar,<sup>†</sup> Kenji Takada,<sup>†</sup> and Tatsuo Kaneko<sup>\*†</sup>*

<sup>†</sup>Graduated School of Advanced Science and Technology, Japan Advanced Institute  
of Science and Technology, 1-1 Asahidai, Nomi, Ishikawa 923-1292, Japan

<sup>‡</sup>Department of Chemistry, Faculty of Science, Chulalongkorn University, 254  
Phayathai Road, Pathumwan, Bangkok 10330, Thailand

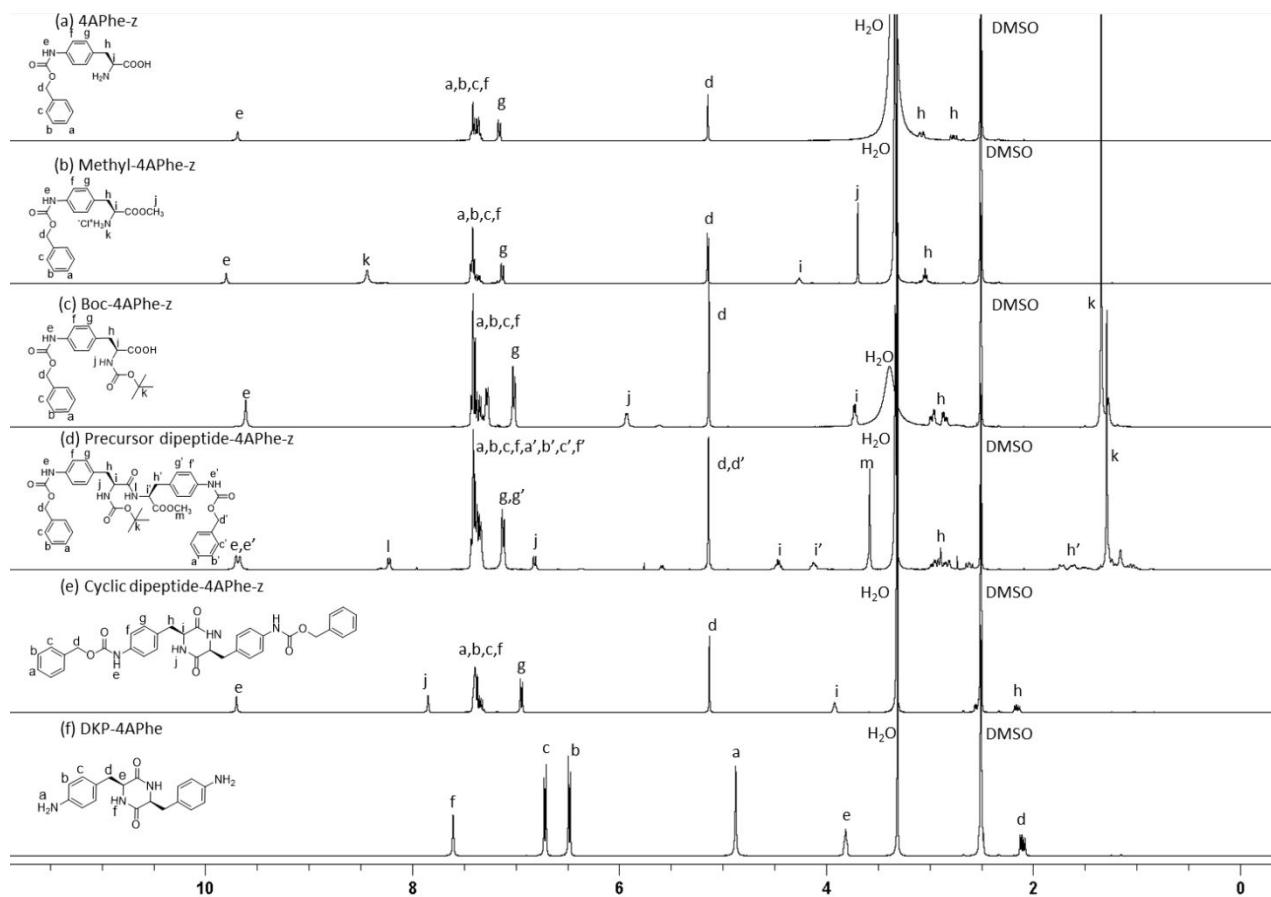

**Figure S1.**  $^1\text{H}$  NMR spectra of (a) 4APhe-z, (b) Methyl-4APhe-z, (c) Boc-4APhe-z, (d)

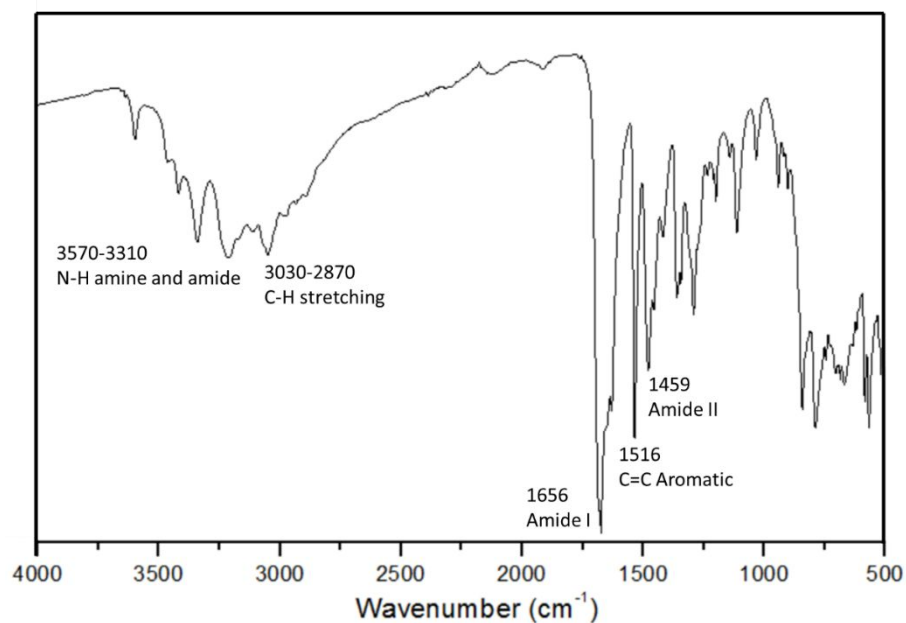

Precursor dipeptide of 4APhe-z, (e) Cyclic dipeptide-4APhe-z, and (f) DKP-4APhe.

**Figure S2.** FT-IR spectrum of DKP-4APhe

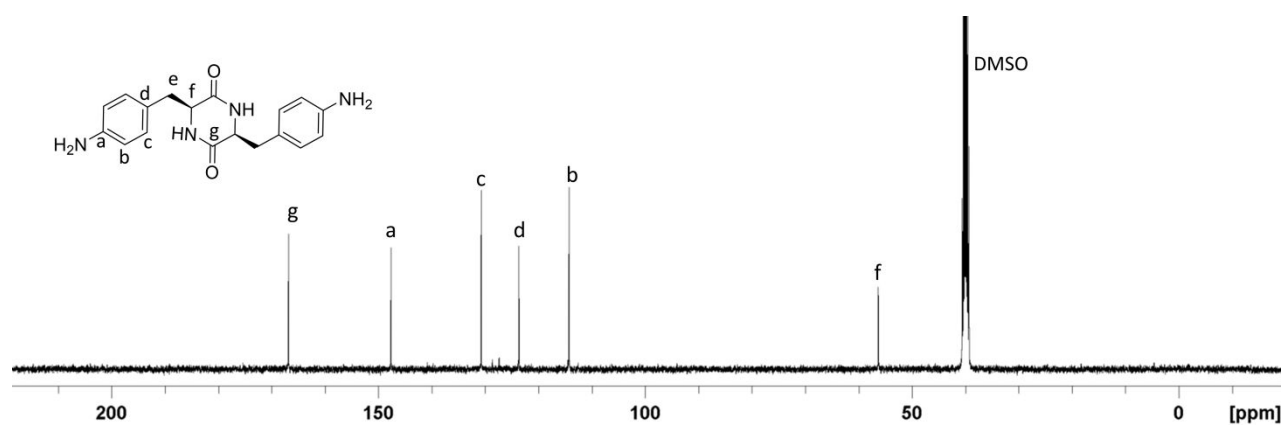

**Figure S3.** <sup>13</sup>C NMR spectrum of DKP-4APhe.

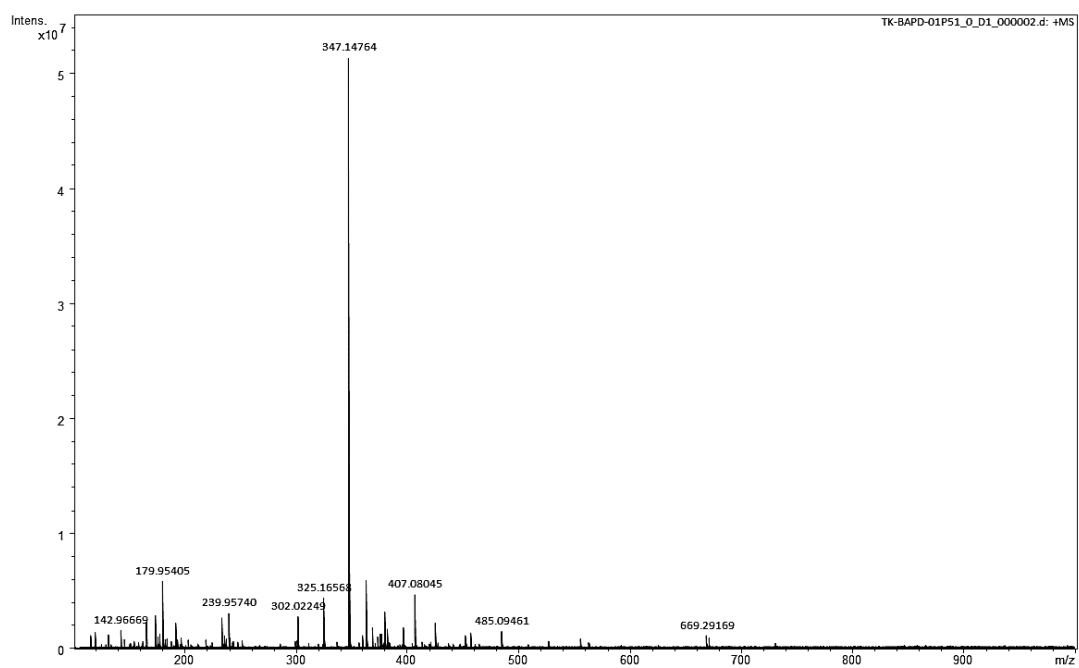

**Figure S4.** Mass spectrum of DKP-4APhe.

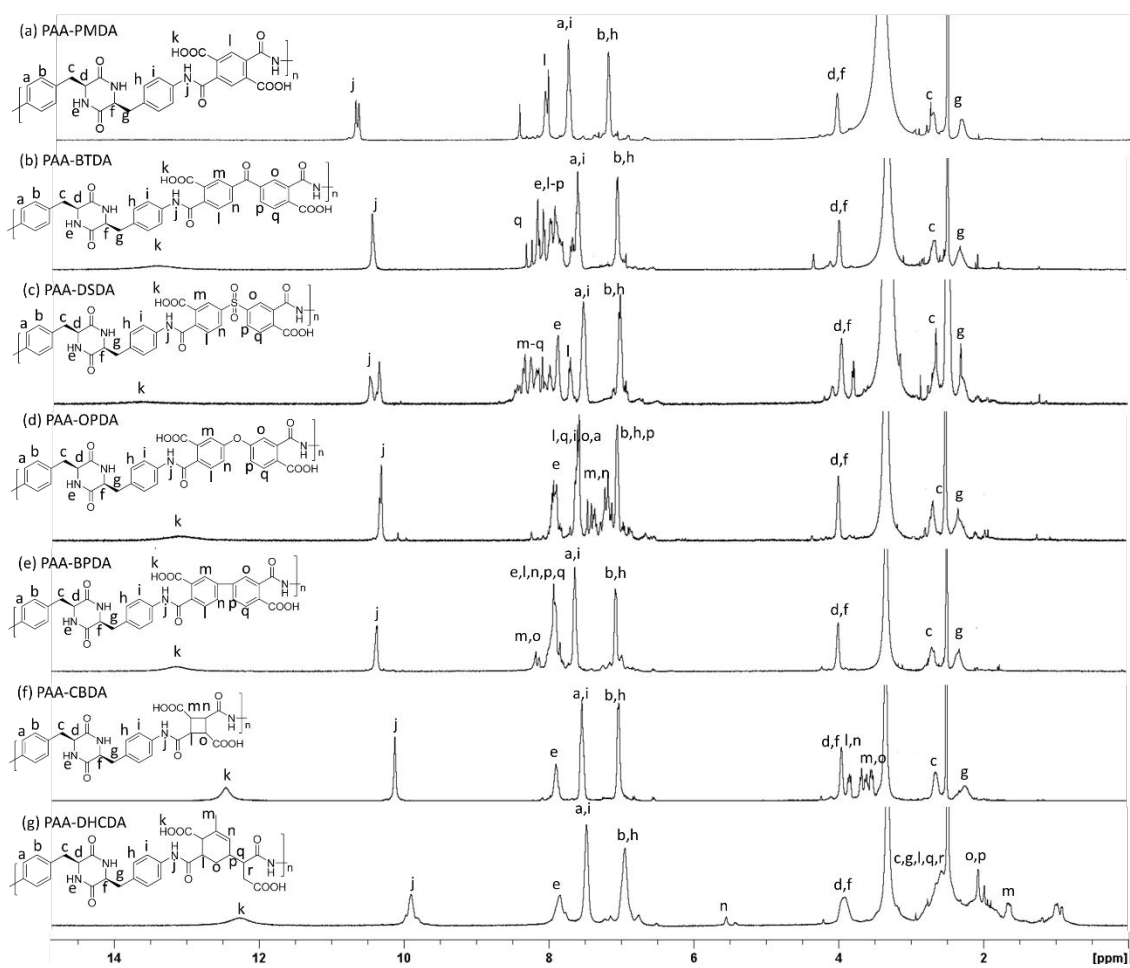

**Figure S5.**  $^1\text{H}$  NMR spectra of (a) PAA-PMDA (b) PAA-BTDA, (c) PAA-DSDA, (d) PAA-OPDA, (e) PAA-BPDA, (f) PAA-CBDA, and (g) PAA-DHCDA.



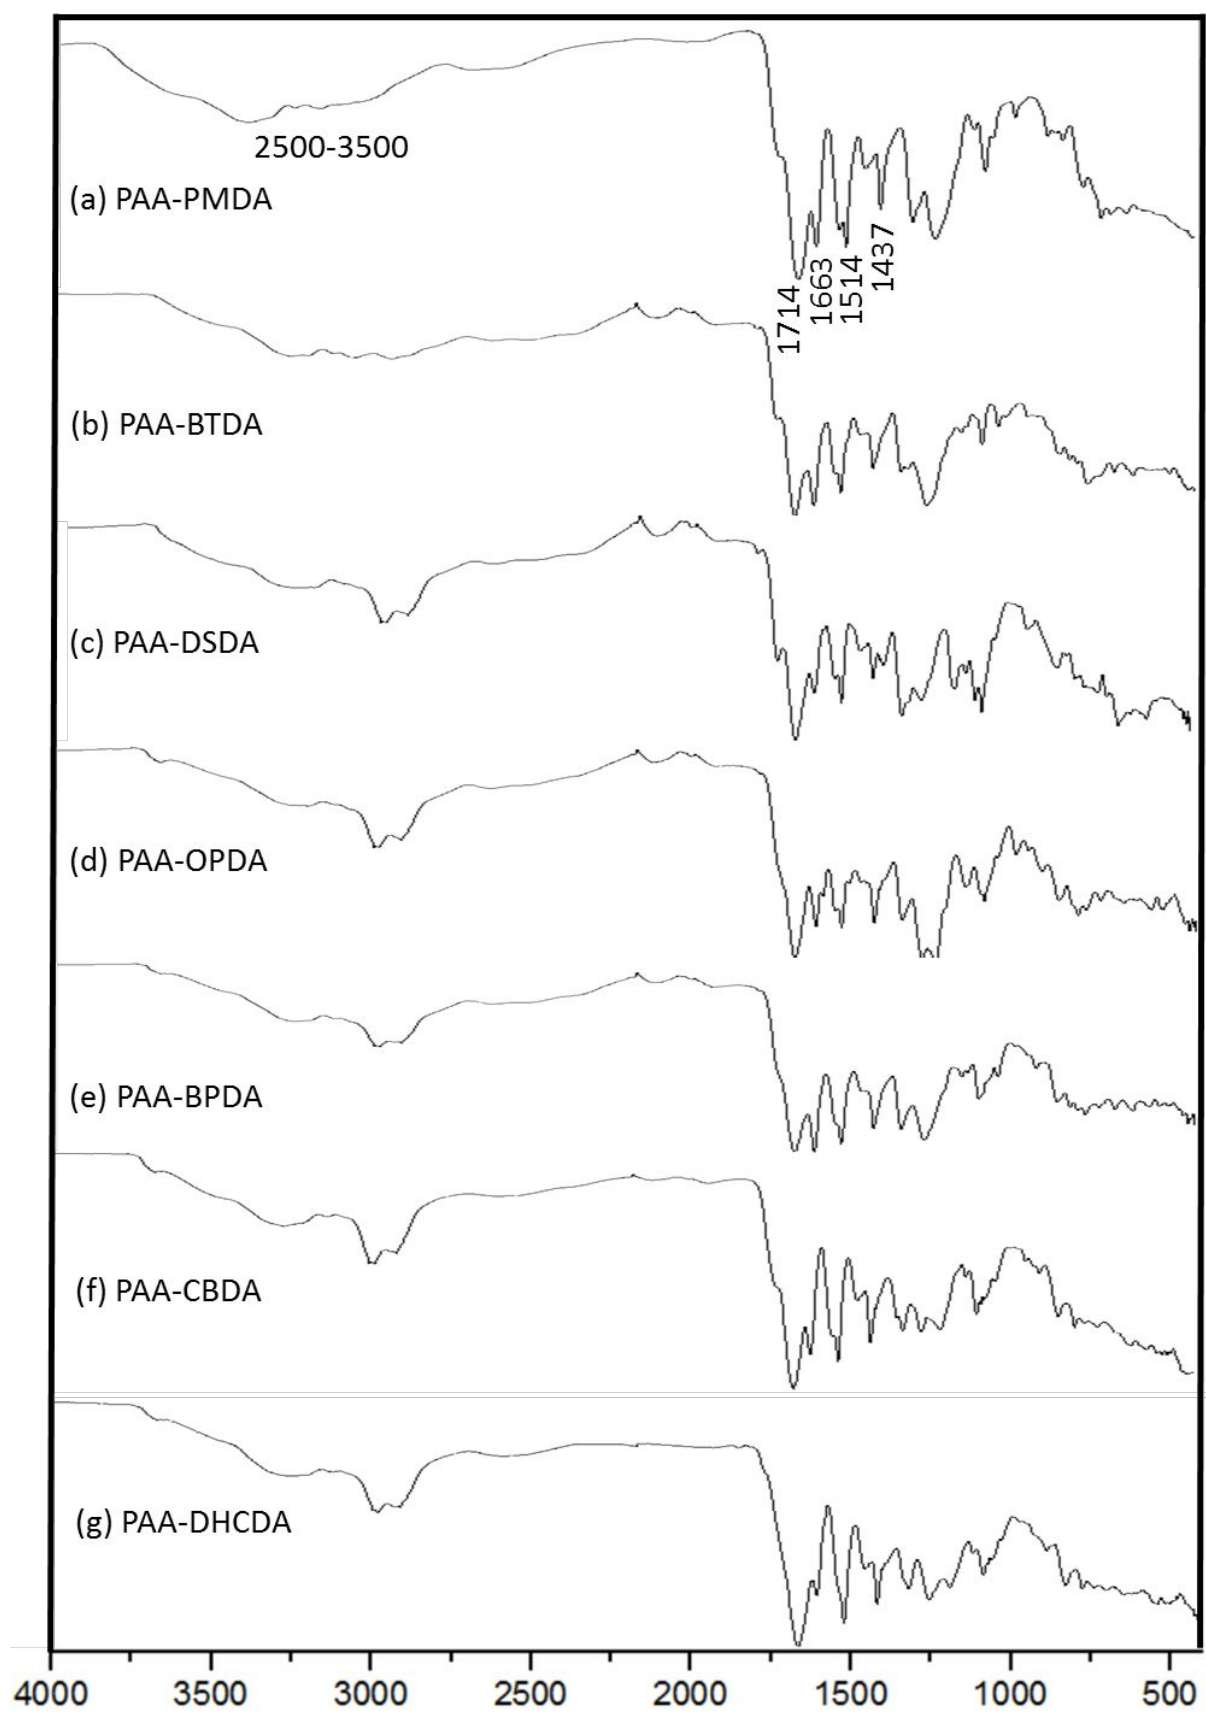

**Figure S6.** FT-IR spectra of (a) PAA-PMDA (b) PAA-BTDA, (c) PAA-DSDA, (d) PAA-

OPDA, (e) PAA-BPDA, (f) PAA-CBDA, and (g) PAA-DHCDA.

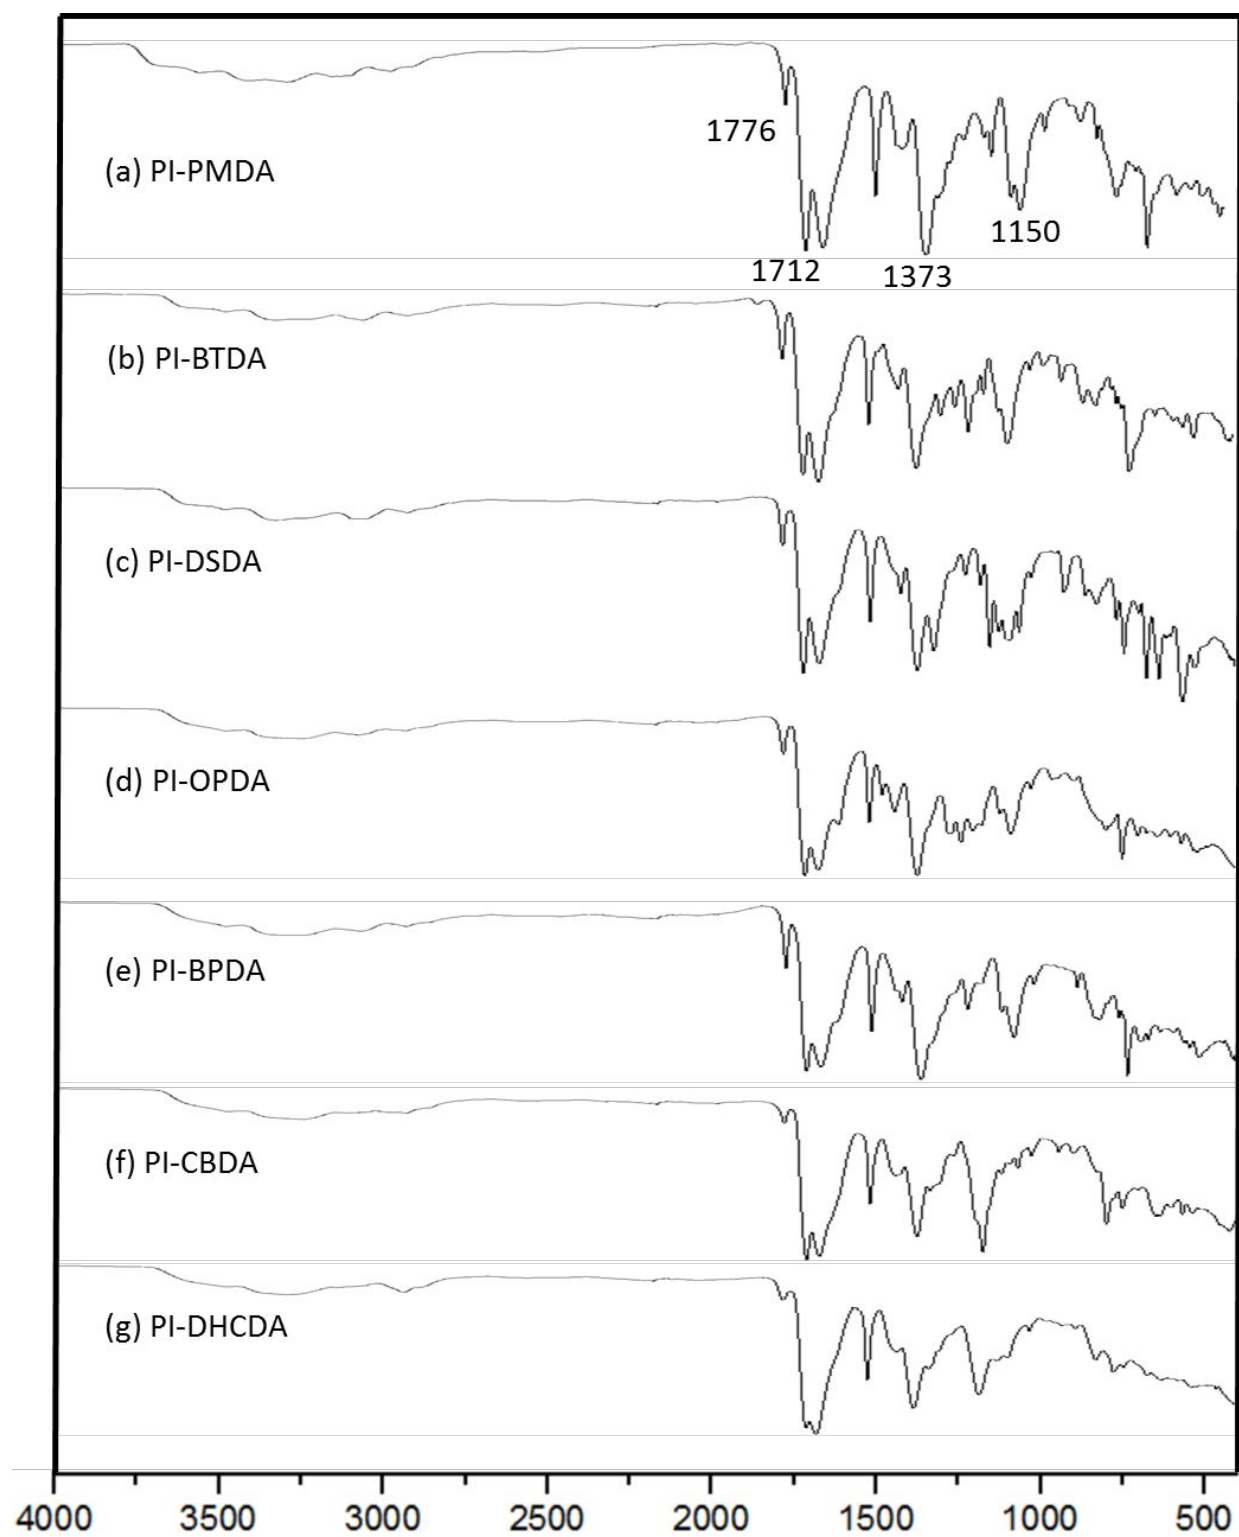



**Figure S7.** FT-IR spectra of (a) PI-PMDA, (b) PI-BTDA, (c) PI-DSDA, (d) PI-OPDA, (e) PI-BPDA, (f) PI-CBDA, and (g) PI-DHCDA.

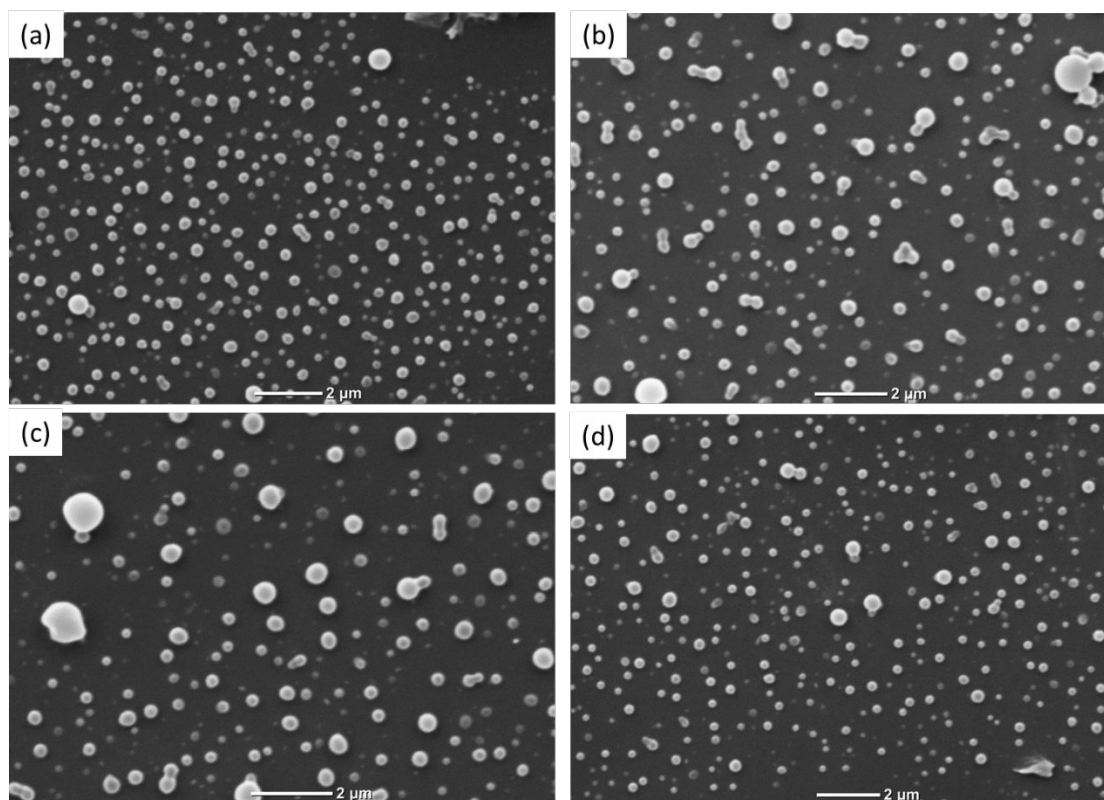

**Figure S8.** SEM images of PAA particles formed under PAA concentration of 4 wt% and triton X-100 of 1 wt%. (a) PAA-BTDA, (b) PAA-CBDA, (c) PAA-DSDA and (d) PAA-PMDA. The diameter of PAA particles were estimated as (a)  $284 \pm 82$ , (b)  $375 \pm 128$ , (c)  $448 \pm 159$  and (d)  $279 \pm 69$  nm.

**Table S1.** Particle size and size distribution of PAA and PI particles measured by DLS

| Polymers | Particle size (nm) | Size distribution |
|----------|--------------------|-------------------|
| PAA-BTDA | 295                | 0.100             |
| PAA-CBDA | 397                | 0.194             |
| PAA-DSDA | 531                | 0.219             |
| PAA-PMDA | 303                | 0.150             |
| <hr/>    |                    |                   |
| PI-BTDA  | 396                | 0.214             |
| PI-CBDA  | 459                | 0.259             |
| PI-DSDA  | 531                | 0.349             |
| PI-PMDA  | 780                | 0.472             |

**Table S2.** Zeta potential of PAA particles dispersed in water measured by DLS

| Nanoparticles | Zeta potential (mV) |
|---------------|---------------------|
| PAA-BTDA      | -39.9±7.7           |
| PAA-CBDA      | -23.7±4.8           |
| PAA-DSDA      | -38.1±4.8           |
| PAA-PMDA      | -26.3±4.7           |

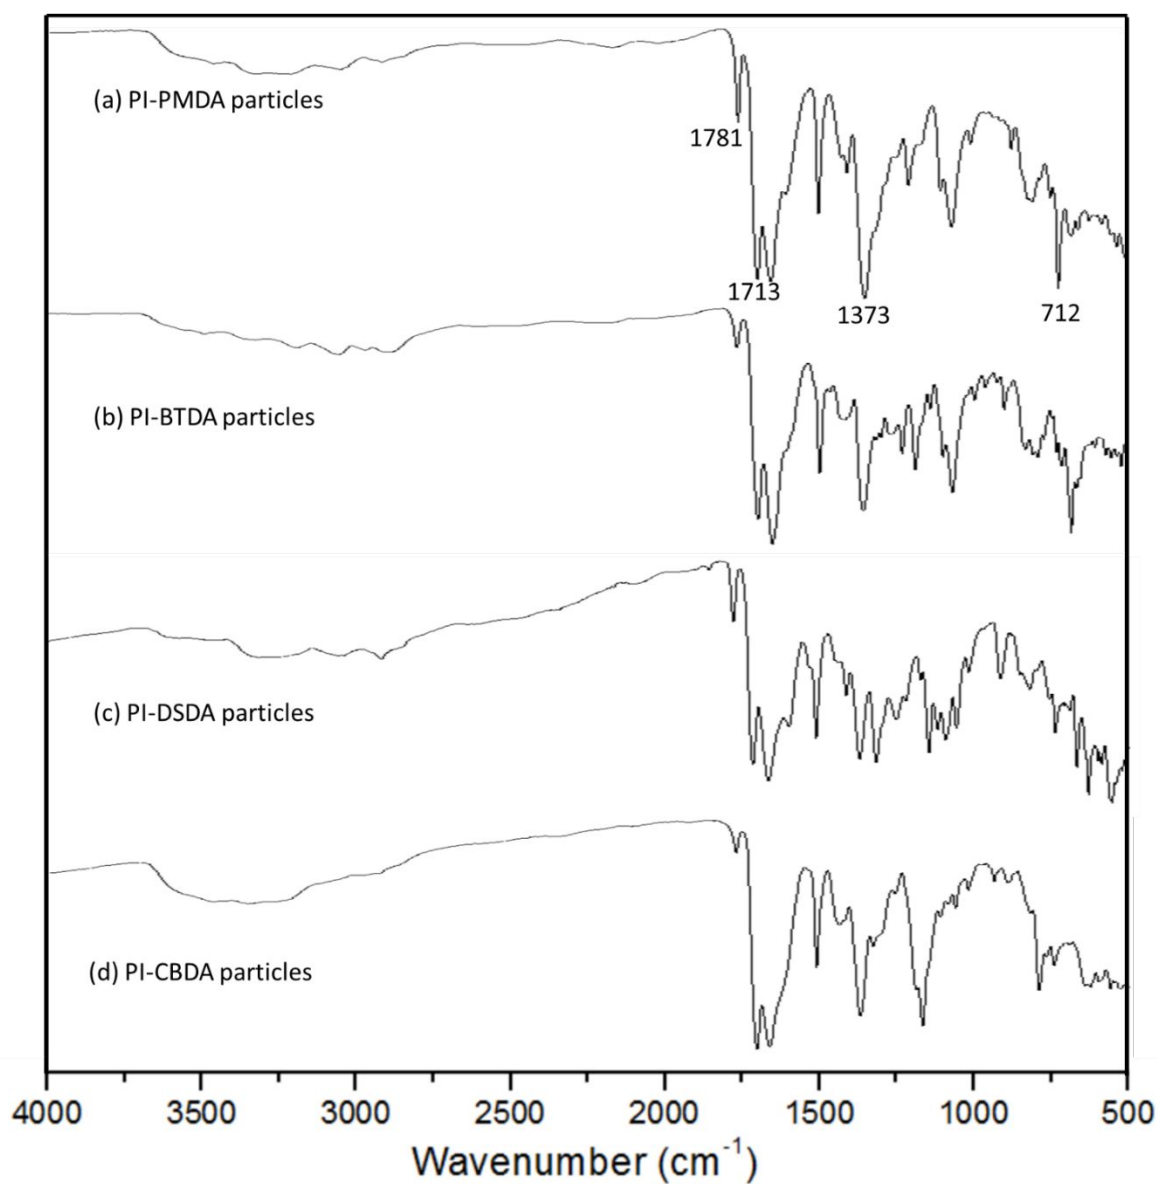

**Figure S9.** FT-IR spectra of PIs particles. (a) PI-PMDA, (b) PI-BTDA, (c) PI-DSDA, and (d) PI-CBDA.

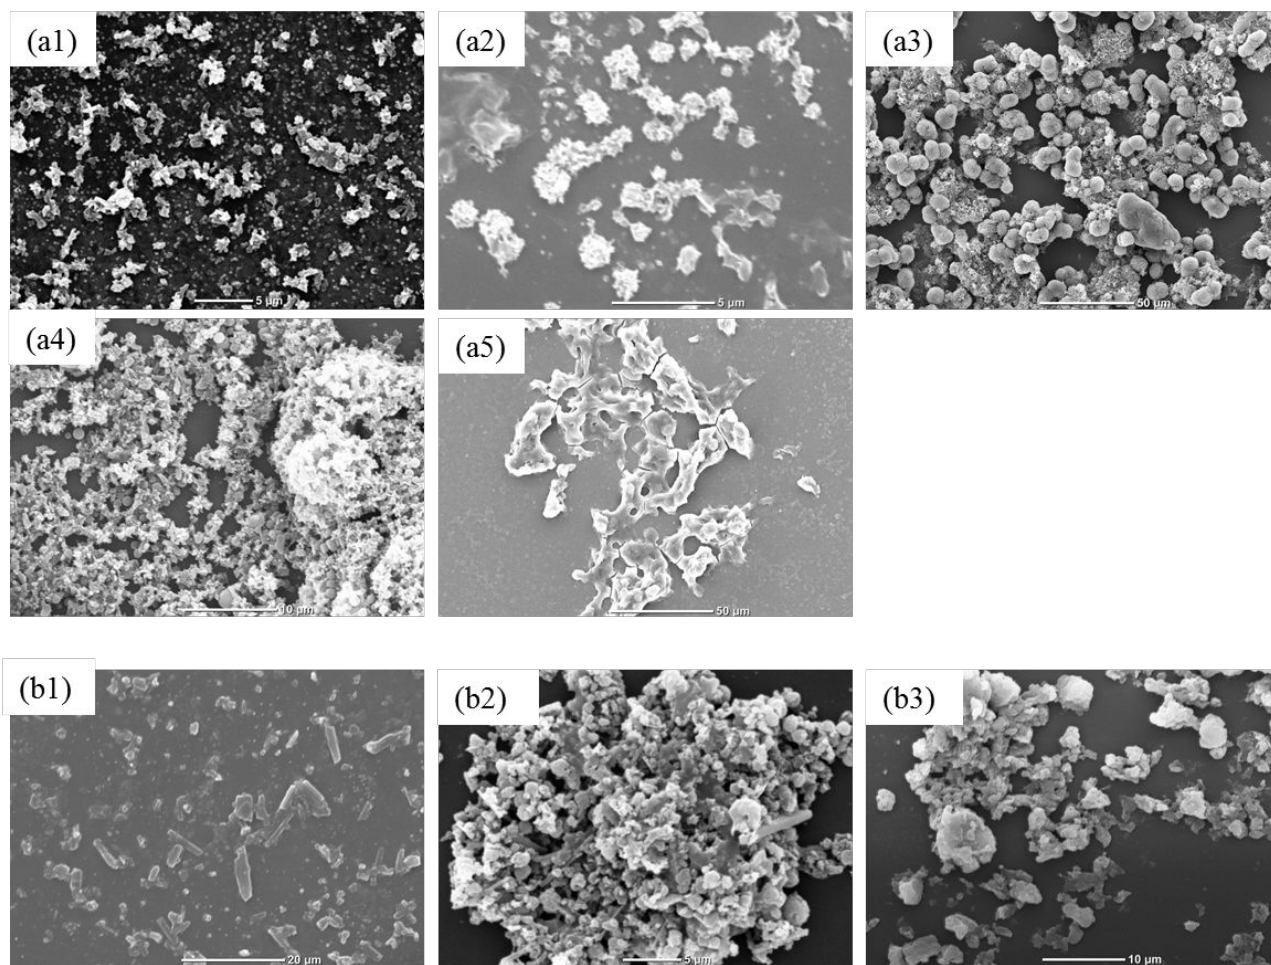

**Figure S10.** SEM images of PI-BTDA particles obtained by PAA-BTDA particles by a two-step imidization. The PAA particles were prepared by redispersion of PAA spheres into various mixed solvents of acetone with water (acetone compositions (a1) 5%, (a2) 10%, (a3) 50%, (a4) 70% and (a5) 100%) and of methanol with water (methanol compositions (b1) 20%, (b2) 70% and (b3) 100%), and by following sonication.

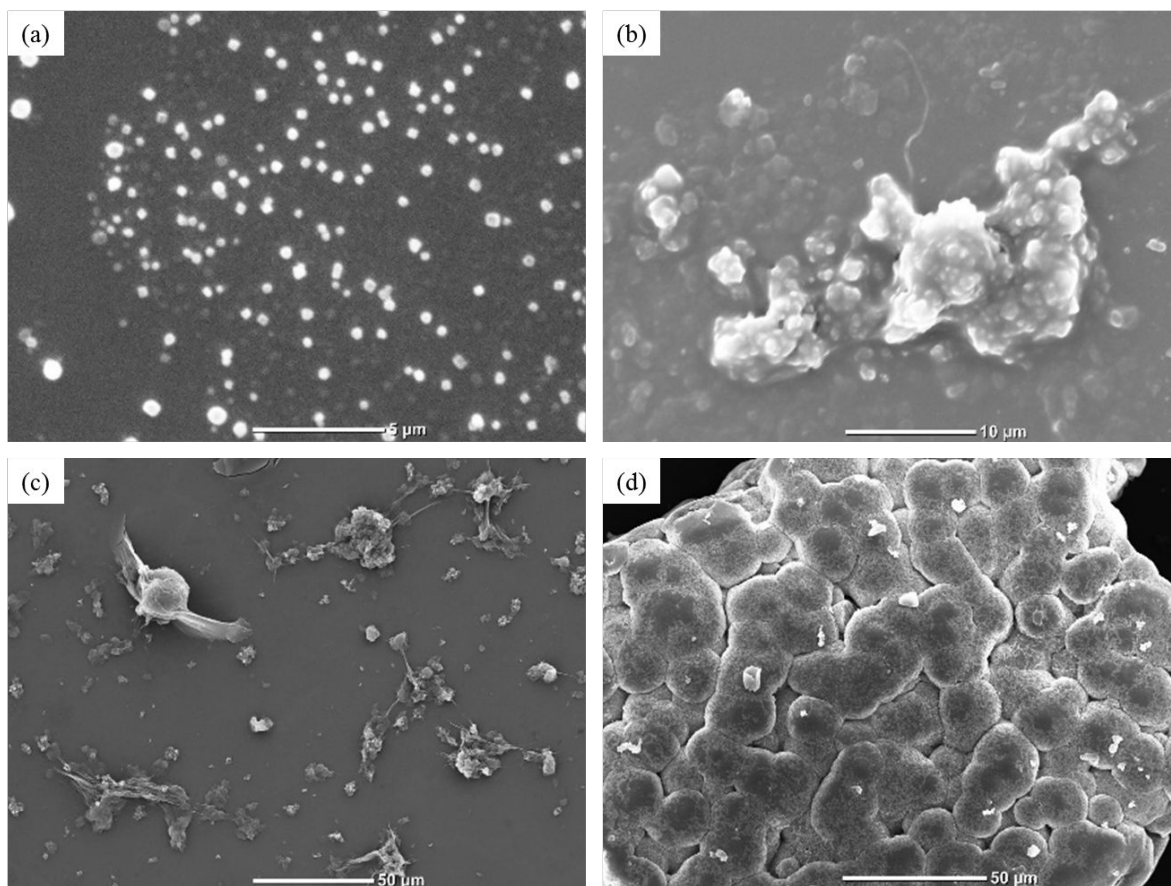

**Figure S11.** SEM images of PAA derived from 4ATA dimethyl ester with BTDA. (a) Particles formed by solvent displacement from DMAc solution into water. (b, c, d) Particles or aggregates formed by subsequent redispersion into solvent mixtures of (b) 20% acetone/80% water, (c) 40% methanol/60% water, and (d) cyclohexane, and following sonication.
